# Supplementary material
Source: ML conference proceedings conference paper supplement (https://openaccess.thecvf.com/content/CVPR2026/html/Yao_BiEvLight_Bi-level_Learning_CVPR_2026_paper.html)
Supplement: Supplementary file 1 [file Yao_BiEvLight_Bi-level_Learning_CVPR_2026_supplemental.pdf]

# BiEvLight: Bi-level Learning of Task-Aware Event Refinement for Low-Light Image Enhancement

## Supplementary Material

In this supplementary material, we provide additional details and experimental results. First, we outline the framework details of BiEvLight in Sec. 1. Next, Sec. 3 offers descriptions of the training settings. In Sec. 4, we provide more qualitative examples to illustrate the model’s performance.

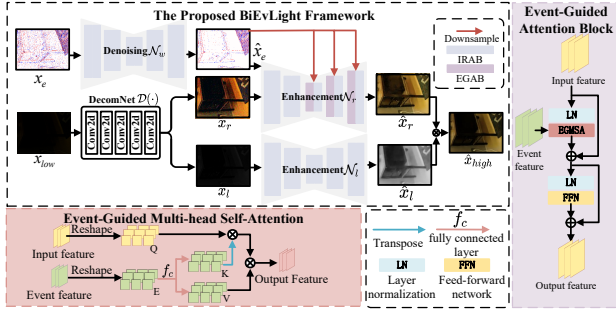

Figure 1. Qualitative analysis of denoising hyperparameters  $q$  and window size  $W$ .

### 1. Framework Details

The training strategy of the proposed BiEvLight has been elaborated in the main paper. Here, we provide a more detailed description of the network composition of BiEvLight and the processing of input images  $x_{low}$  and denoising event  $\hat{x}_e$ .

Specifically, as shown in Fig. 1, BiEvLight consists of an event denoising network  $\mathcal{N}_w(\cdot)$  and an enhancement network  $\mathcal{N}_\theta(\cdot)$  (comprising three subnetworks: a pre-trained decomposition network  $\mathcal{D}(\cdot)$ , a reflectance enhancement network  $\mathcal{N}_r(\cdot)$ , and an illumination enhancement network  $\mathcal{N}_l(\cdot)$ , where  $\mathcal{D}(\cdot)$  is frozen and excluded from the training process).

Regarding the detailed network configuration, excluding the pre-trained decomposition network  $\mathcal{D}(\cdot)$ , the remaining subnetworks are built upon a unified 3-level encoder-decoder architecture. Specifically, in the reflectance enhancement network  $\mathcal{N}_r(\cdot)$ , the denoised event stream  $\hat{x}_e$  is first encoded via convolution and downsampling operations to generate multi-scale features  $F_{ev}$  that align with the spatial resolution of the image features  $F_{img}$ . Subsequently, these event features are hierarchically injected into the network starting from the bottleneck layer via the Event-Image Feature Fusion Block, thereby incorporating multi-scale structure-guided information.

Specifically, the Event-Image Attention Block is de-

signed to efficiently incorporate structural priors from the event modality into image features via a cross-attention mechanism. In the core attention computation, we project the input image features as Queries ( $Q$ ) and the event features as Keys ( $K$ ) and Values ( $V$ ). To reduce computational complexity while preserving a global receptive field, we adopt a Transposed Attention strategy, calculating the feature cross-covariance matrix  $A$  in the channel dimension rather than the traditional spatial dimension. Furthermore, an implicit positional encoding based on depth-wise separable convolutions is introduced in parallel to supplement local spatial context, followed by a residual connection for effective feature aggregation:

$$\begin{aligned} Q &= W_q F_{img}, \quad K = W_k F_{ev}, \quad V = W_v F_{ev}, \\ A &= \text{Softmax}(\alpha \cdot \bar{K} \bar{Q}^T), \end{aligned} \quad (1)$$

$$F_{out} = W_p (AV) + \text{CPE}(V) + F_{img},$$

where  $W_q, W_k, W_v, W_p$  denote the linear projections, and  $\bar{Q}, \bar{K}$  represent the  $L_2$ -normalized query and key features, respectively.  $\alpha$  is a learnable scaling factor used to modulate the attention map  $A$ , which is calculated along the channel dimension. Additionally,  $\text{CPE}(\cdot)$  refers to the conditional positional encoding implemented by depth-wise separable convolutions to capture local spatial context.

Given the input image  $x_{low}$  and the denoised events  $\hat{x}_e$ , we first employ shallow projection layers to process the distinct modal information independently. Subsequently, the shallow features from both modalities are fused and propagated forward. The merged features pass through three encoder stages, where they undergo interactive fusion with the aforementioned event features, followed by three decoder stages and an output projection layer to generate the enhanced reflectance  $\hat{x}_r$ . Finally, based on Retinex theory, the enhanced image is obtained as  $\hat{x}_{high} = \hat{x}_r \odot \hat{x}_l$ .

### 2. Complexity and hyperparameters Analysis

As shown in Tab. 2, BiEvLight introduces no extra inference latency. Despite a 23% rise in training time over the alternating strategy, it yields a notable **0.64 dB** gain in PSNR\*. Notably, the proposed framework is compatible with single-loop bilevel algorithms, which can be leveraged for scaling to larger networks.

Similar to common practice, the **step size** in BiEvLight follows a cosine annealing schedule with restarts. It is initialized at **2e-4** and decays to **1e-6** over **150k** iterations. We observed no instability with this setup. Regard-

Table 1. Quantitative comparison with advanced methods of low-light image enhancement on SDE and SDSD dataset. The red and blue represent the best and second-best values.

| Datasets  |        | Image Only      |                  |                 |                 |                 |                 | Image + Event   |                |                 |                |
|-----------|--------|-----------------|------------------|-----------------|-----------------|-----------------|-----------------|-----------------|----------------|-----------------|----------------|
|           |        | SNRNet          | FourLLIE         | Reformer        | NeRCo           | SCI++           | URWKV           | eSLNet          | ELIE           | EvLight         | BiEvLight      |
| Reference |        | <i>CVPR' 22</i> | <i>ACM MM'23</i> | <i>ICCV' 23</i> | <i>ICCV' 23</i> | <i>TPAMI'25</i> | <i>CVPR' 25</i> | <i>ECCV' 20</i> | <i>TMM' 23</i> | <i>CVPR' 24</i> |                |
| SDE-in    | PSNR↑  | 20.3482         | 19.7856          | 21.3169         | 19.4266         | 12.4683         | 21.5831         | 21.3622         | 22.0414        | <b>22.1880</b>  | <b>22.8680</b> |
|           | PSNR*↑ | 23.6785         | 23.2709          | 23.6502         | 23.2052         | 22.3026         | 22.6191         | 23.0825         | 23.6395        | <b>23.6940</b>  | <b>26.0023</b> |
|           | SSIM↑  | 0.6267          | 0.6176           | 0.6873          | 0.5626          | 0.4928          | 0.7168          | 0.7023          | 0.7083         | <b>0.7189</b>   | <b>0.7750</b>  |
| SDE-out   | PSNR↑  | 21.5542         | 20.6323          | 22.3075         | 18.4125         | 12.0277         | 22.3732         | 20.6244         | 22.2167        | <b>22.4372</b>  | <b>24.3599</b> |
|           | PSNR*↑ | 23.3224         | 22.1990          | 23.9459         | 22.2225         | 23.2990         | 24.0964         | 22.3612         | 23.6772        | <b>24.4223</b>  | <b>26.1617</b> |
|           | SSIM↑  | 0.6508          | 0.6410           | 0.6981          | 0.5490          | 0.3033          | 0.6880          | 0.6295          | 0.7002         | <b>0.7070</b>   | <b>0.7451</b>  |
| SDSD-in   | PSNR↑  | 25.9892         | 24.2775          | 27.7175         | 19.9693         | 9.9750          | 28.7034         | 25.8946         | 28.3385        | <b>29.3563</b>  | <b>30.7576</b> |
|           | PSNR*↑ | 26.4070         | 28.0437          | 28.2613         | 23.4650         | 29.3317         | 28.9094         | 26.3361         | 29.6009        | <b>30.4038</b>  | <b>30.9992</b> |
|           | SSIM↑  | 0.8730          | 0.8668           | 0.9125          | 0.7821          | 0.3108          | 0.9158          | 0.8961          | 0.9187         | <b>0.9250</b>   | <b>0.9473</b>  |
| SDSD-out  | PSNR↑  | 23.6656         | 23.4002          | 26.3934         | 21.7971         | 18.9373         | 22.0251         | 23.3921         | 25.0251        | <b>26.7407</b>  | <b>27.4108</b> |
|           | PSNR*↑ | 27.0967         | 27.7418          | 28.6221         | 27.6637         | 28.8727         | 27.2018         | 26.3331         | 29.1202        | <b>30.3066</b>  | <b>30.4579</b> |
|           | SSIM↑  | 0.8310          | 0.7944           | 0.8485          | 0.7482          | 0.5776          | 0.8176          | 0.8031          | 0.8626         | <b>0.8673</b>   | <b>0.8873</b>  |

Table 2. Comparison of model parameters (M), FLOPs (G) and FPS (Frames) on  $256 \times 256$  images, training time (Hours), and PSNR\* on SED\_in Dataset.

| Methods     | SSIM  | PSNR* | #Params | FLOPs  | FPS | Train Cost |
|-------------|-------|-------|---------|--------|-----|------------|
| URWKV       | 0.716 | 22.61 | 2.25    | 36.67  | 11  | 56         |
| eSLENet     | 0.702 | 23.08 | 0.19    | 471.81 | 11  | 28         |
| ELIE        | 0.708 | 23.63 | 220.01  | 201.57 | 4   | 93         |
| EvLight     | 0.718 | 23.69 | 22.73   | 194.24 | 18  | 34         |
| Joint       | 0.735 | 24.23 | 2.471   | 61.58  | 24  | 19         |
| Alternating | 0.769 | 25.36 | 2.471   | 61.59  | 24  | 39         |
| BiEvLight   | 0.775 | 26.00 | 2.471   | 61.59  | 24  | 48         |

ing the finite-difference scale  $\epsilon$ , it is **adaptively scaled** as  $\epsilon = m / \|\nabla_{\theta} \varphi(w_k, \theta')\|_2$  to ensure numerical stability during optimization. Robustness tests (Tab. 3) show stable performance across different \*m\* (we used **0.01**).

Table 3. Sensitivity analysis of the scaling factor  $m$  on the SED\_in dataset.

| m     | SSIM  | PSNR* |
|-------|-------|-------|
| 0.005 | 0.772 | 25.85 |
| 0.01  | 0.775 | 26.00 |
| 0.05  | 0.771 | 25.92 |
| 0.1   | 0.772 | 25.76 |

For the sensitivity of threshold  $q$  and denoising window  $W$  (Fig. 2), in BiEvLight, we set  $q = 0.01$  and  $W = 5$ . As shown, high  $q$  erases details, while low  $q$  retains noise. We chose  $q = 0.01$  as a trade-off. Although slight texture loss or noise may persist, this is specifically resolved by our interaction strategy, which uses feedback to recover textures and suppress noise. The second row illustrates the impact of varying  $W$  with  $q = 0.01$ . The denoising results remain consistent across different window sizes, demonstrating the robustness of our strategy. The results without the local window strategy (w/o  $W$ ) are also displayed. Furthermore, the denoising pseudo-labels are guided by the gradient of the ground truth reflectance, thereby avoiding inaccuracies

rate gradient estimations caused by low-light degradation.

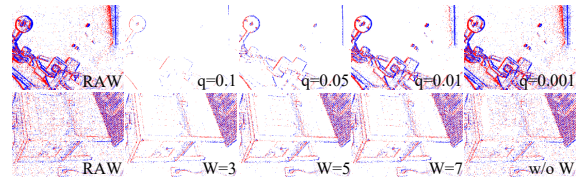

Figure 2. The network architecture of the proposed BiEvLight.

### 3. Implementation Detail

Our models were trained using the Adam optimizer with an initial learning rate set to  $2e-4$ . All experiments were conducted on a single NVIDIA RTX 3090 GPU, utilizing a batch size of 8. To enhance model generalization and robustness, we applied several data augmentation techniques during training. These included random cropping to a patch size of  $128 \times 128$  pixels, and random rotations at angles of 90, 180, and 270 degrees.

### 4. More Qualitative Results

In this section, we present additional visual examples for various state-of-the-art models.

**Comparison on SDSD Dataset:** Similarly, we conducted comparative experiments on the SDSD dataset, with quantitative results detailed in Tab. 1. BiEvLight achieved optimal performance in both indoor and outdoor scenarios. Specifically, for SDSD-in and SDSD-out tasks, our method surpasses Evlight with PSNR improvements of 1.41 dB and 0.67 dB, respectively. For the PSNR\*, BiEvLight demonstrates competitive advantages with improvements of 0.60 dB for SDSD-in and 0.15 dB for SDSD-out. These results comprehensively demonstrate the effectiveness of the proposed BiEvLight method.

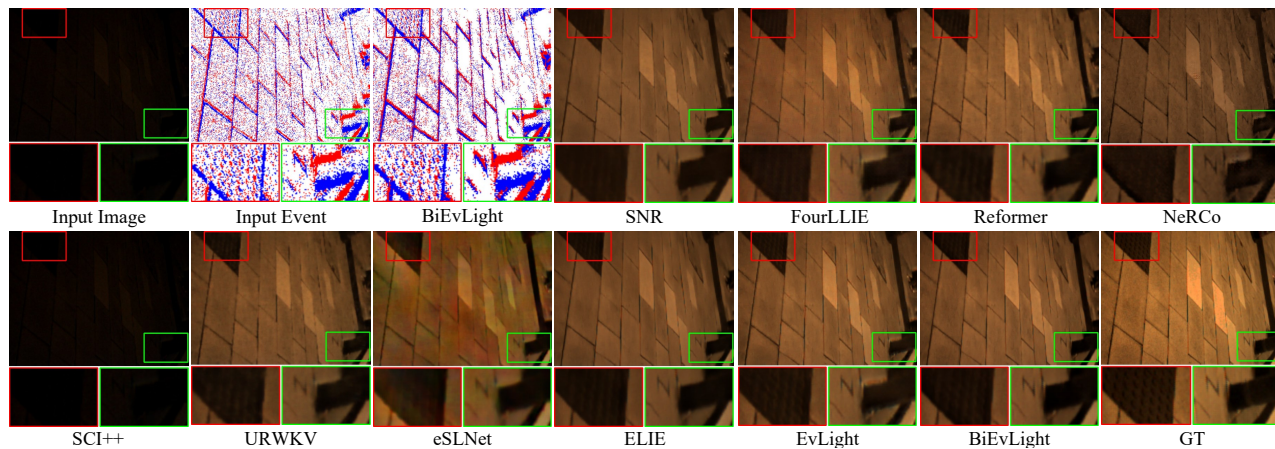

Figure 3. Qualitative results on SDE-out dataset.

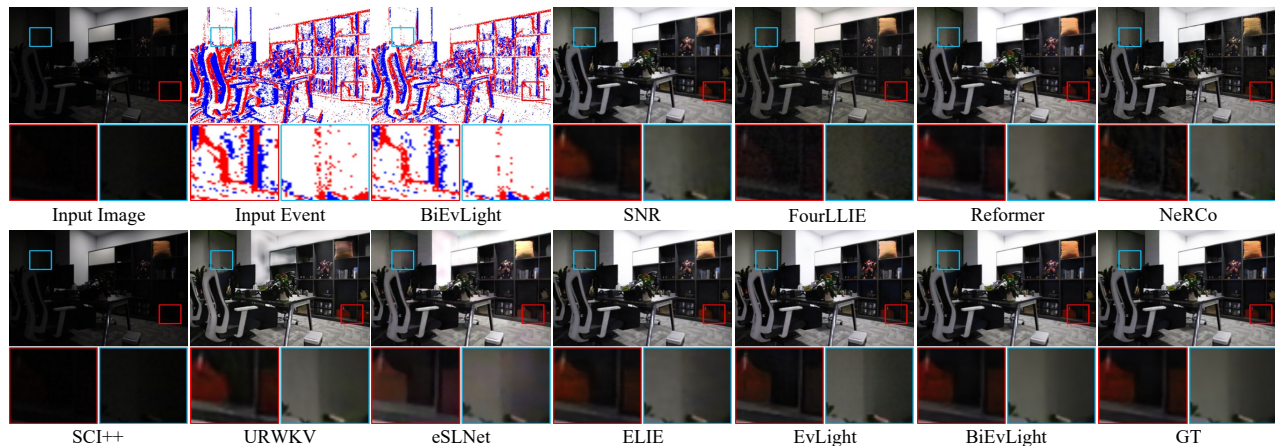

Figure 4. Qualitative results on SDSD dataset.

Qualitatively, as shown in Fig. 4, even though the event streams generated by the simulator contain only a small amount of noise, it can still degrade task performance if not addressed. As illustrated in the magnified regions, our method effectively preserves valid events while precisely removing redundant noise, and successfully recovers under-exposed image details, further highlighting its efficacy.
